# Supplementary material for: A survey of beetles (Coleoptera) from the tundra surrounding the Nunalleq archaeological site, Quinhagak, southwestern Alaska
Source: Biodivers Data J. 2018 Mar 2;(6):e22788. doi: 10.3897/BDJ.6.e22788 (PMC5904539; doi:10.3897/BDJ.6.e22788)
Supplement: Supplementary material 1 — List of beetle taxa identified at Quinhagak, with a summary of their habitats/ecology [file bdj-06-e22788-s001.xlsx]

## Sheet: Feuil1
	ID	ECOLOGY																						DISTRIBUTION			Possible first record for Y-K delta	Total specimens
		BG	CA	CG	BP	DS	DU	DV	DT	F	H	MO	MT	NB	O	R	SB	SW	TV	X	WB	WL	WT	Ho	Ne	Ad
CARABIDAE
Notiophilus borealis Harris	YB								✓				✓		✓				x	x				x			x	5
Carabus truncaticollis Eschscholtz	DS					✓							✓											x				84
Carabus maeander Fischer von Waldheim	DS				x	✓					x		x										✓	x				8
Diacheila polita (Faldermann)	DS					✓			✓				✓	✓	x								✓	x				59
Elaphrus lapponicus Gyllenhal	YB				x	✓					x		✓											x			x	2
Elaphrus (Elaphrus) trossulus Semenov	YB	✓		✓													✓							x				1
Bembidion grapii Gyllenhal	YB					✓									x				x					x				4
Patrobus cinctus Motschulsky	VF			✓	x						x		x			x							x	x				2
Patrobus stygicus Chaudoir	YB	x									x				✓	x	✓						✓	x				3
Dicheirotrichus (Trichocellus) cognatus (Gyllenhal)	YB					✓											x					x		x				1
Agonum quinquepunctatum Motschulsky	DS	x									x		✓		✓								✓	x				9
Pterostichus adstrictus Eschscholtz	DS	x				✓		x							x		✓			x	x	✓		x				7
Pterostichus (Cryobius) brevicornis brevicornis (Kirby)	VF							x					x				x					✓		x				2
Pterostichus (Cryobius) brevicornis group	YB					✓		x	x				x		✓		✓					✓		x				14
Pterostichus (Cryobius) pinguedineus (Eschscholtz)	YB	x				✓		x	✓				✓									✓	x	x				51
Pterostichus (Cryobius) similis Mannerheim	YB					✓		x					✓				✓					✓		x				10
Pterostichus (Cryobius) ventricosus ventricosus(Eschscholtz)	YB					✓		x	x													x		x				2
Pterostichus agonus Horn	DS					✓		x					✓		x								x	x				4
Amara patruelis Dejean	YB					✓									x		✓		x					x				19
Amara alpina (Paykull)	YB					✓			✓						x					x	x	x		x				17
DYSTICIDAE
Hydroporus lapponum Gyllenhal	DL																	✓					x	x			x	12
Hydroporus morio Aubé	DL	x																✓					✓	x			x	4
Hydroporus notabilis LeConte	VF																	✓						x				2
Hydroporus striola (Gyllenhal)	DL																	✓						x			x	1
Agabus velox Leech	DL	x																✓					✓		x		x	3
Ilybius angustior (Gyllenhal) complex	DL																	✓										3
Ilybius picipes (Kirby)	VF	x																✓					x	x				2
Ilybius vittiger (Gyllenhal)	DL	x							✓				✓					✓					✓	x				7
LEIODIDAE
Colon politum Peck & Stephan	AD					✓	✓	x														✓		x			x	2
Catops alpinus Gyllenhal	AD		✓											x								✓		x			x	3
SILPHIDAE
Thanatophilus lapponicus (Herbst)	DS		✓												x							✓		x			x	1
Thanatophilus sagax (Mannerheim)	DS		✓			✓	✓	x									x					✓			x		x	3
STAPHYLINIDAE
Acidota quadrata (Zetterstedt)	AD				x							x				x						✓	x	x			x	4
Eucnecosum brachypterum (Gravenhorst)	MKT							x					✓	x	✓	x						✓		x				8
Eucnecosum brunnescens (J.R. Sahlberg)	MKT							x					✓	x	✓	x						x		x				9
Eucnecosum cf. tenue (LeConte)	AD							x					✓	x	✓	x						x		x			x	3
Olophrum latum Mäklin	AD	x	x					x			x					x		x				x	✓	x				4
Holoboreaphilus nordenskioldi (Mäklin)	AD							x				x	x									x	✓	x			x	1
Pycnoglypta heydeni Eppelsheim	AD	x					x			x		x	✓	x							x	✓	✓	x			x	20
Ischnosoma longicorne (Mäklin)	AD						x	x	✓		x	x		x		x				x	x	x	x	x				1
Tachinus frigidus Erichson	MKT			✓			x			x				x								x			x		x	1
Aleochara (Coprochara) suffusa (Casey)	JK																✓								x		x	6
Atheta (s. str.) graminicola (Gravenhorst)	JK																					✓		x				1
Atheta (s. str.) sp.	JK												✓															1
Dimetrota sp.	JK																						✓				x	1
Boreophilia caseyi Lohse	JK												✓												x		x	2
Boreophilia cf. islandica (Kraatz)	JK												✓											x				4
Boreophilia subplana (J.R. Sahlberg)	JK												✓											x			x	2
Liogluta (Liogluta) granulosa Lohse	JK								✓								x				x	✓			x			6
Liogluta sp.	JK																					✓						1
Lypoglossa angularis angularis Mäklin	JK						x					x		x								✓			x			4
Lypoglossa angularis Mäklin	JK						x					x		x								✓			x			3
Philhygra malleoides Lohse	JK										x		✓			x							x		x		x	3
Gymnusa smetanai Kilmaszewski	AS										x		✓										x	x			x	2
Athetini indet.	JK												✓															10
Oxypodini indet.	JK																						✓					1
Gnypeta ashei Klimaszewski	JK										x		✓			x							x		x		x	2
Veraphis sp.	AD					✓		x	✓			x		x							x	x						4
Stenus sp. nr. caseyi Puthz	AD										x		✓			x							x				x	1
Stenus immarginatus sensu Puthz	AD																					✓					x	1
Quedius (Raphirus) fellmani (Zetterstedt)	VF	x						x			x	x										✓	x	x				1
Quedius (Raphirus) frigidus Smetana	VF																✓								x		x	1
SCIRTIDAE
Cyphon variabilis (Thunberg)	VF	x				✓		x					✓			x		x				✓	x	x			x	7
BUPRESTIDAE
Melanophila acuminata (DeGeer)	DS					✓							✓								x	x		x				4
BYRRHIDAE
Simplocaria metallica (Sturm)	VF					✓						x												x		x	x	3
ELATERIDAE
Hypolithus littoralis Eschscholtz	DS							x								x	✓							x			x	2
Neohypnodus restrictulus (Mannerheim)	HD																✓								x		x	2
CRYPTOPHAGIDAE
Atomaria sp.	VF					✓		x		x				x							x	x						1
COCCINELLIDAE
Coccinella trifasciata perplexa Mulsant	VF												✓												x			1
LATRIDIIDAE
Corticaria sp.	YB					✓		x					✓										✓				x	6
CHRYSOMELIDAE
Plateumaris flavipes (Kirby)	HD																	x					✓		x		x	2
BRACHYCERIDAE
Notaris aethiops (Fabricius)	PB	x									x		✓									x	✓	x				8
CURCULIONIDAE
Dorytomus leucophyllus (Motschulsky)	PB															✓						✓		x			x	8
Dorytomus rufulus (Mannerheim)	VF																					✓		x			x	1
